# Supplementary material for: De Novo Transcriptome Profiling of Naegleria fowleri Trophozoites and Cysts via RNA Sequencing
Source: MDPI journal article supplement (doi:10.3390/pathogens12020174), 2023-01-22
Supplement: s1 [file s1]

Supplementary Table 1. Sequence of primers used for cloning of *Nf-profilin* gene

| Name    | Primer sequence                      |
|---------|--------------------------------------|
| PF-1    | 5' ATG TGC TTG GAC TCC TTT GCG 3'    |
| PF-3    | 5' ATG GCA TCA TCC AAA AGG GT 3'     |
| PR-4    | 5' ACC AGC CAA ATT CTT AGC TT 3'     |
| PR-5    | 5' GGA AGT TTT CTT CAT CGG CA 3'     |
| PR-7    | 5' TTA TTG CAA AGT ACC AGC AT 3'     |
| vnt-pF1 | 5' ATG GTA CGA GCT TGC TCC AA 3'     |
| vnt-pR1 | 5' TCA TTG GCT GCT CTC TTG AA 3'     |
| vnt-pR2 | 5' ATC AGC AGC ATC AGG TGT TG 3'     |
| vnt-pR3 | 5' GCT CTG CAA CAT CAC ACA GA 3'     |
| PF2     | 5' AGT CTT TGG GCA GAC AAC ACC AA 3' |
| PF2-2   | 5' ATT GCA CCA TCC ACA GTC T 3'      |
